# Supplementary material
Source: HighWire-hosted journal article supplement (doi:10.1101/rna.073965.119)
Supplement: Supplemental_Table_1.xlsx [file Supplemental_Table_1.xlsx]

## Sheet: Sheet1
ID SRA	origin	treatment	type	# reads	reference
SRR8581479	Aag2 cell line	-	small RNA sequencing	31,770,038	This work
SRR8581478	Aag2 cell line	Oxidation-treated	small RNA sequencing	30,391,008	This work
SRR1813824	Whole mosquito - field collected	-	long RNA sequencing	30,605,661	(Aguiar et al. 2015)
SRR1803377	Whole mosquito - field collected	-	small RNA sequencing	9,081,151	(Aguiar et al. 2015)
SRR1803378	Whole mosquito - field collected	-	small RNA sequencing	12,183,902	(Aguiar et al. 2015)
SRR1803379	Whole mosquito - field collected	-	small RNA sequencing	9,253,941	(Aguiar et al. 2015)
SRR1652465	Aag2 cell line	GFP-IP	small RNA sequencing	3,871,075	(Girardi et al. 2017)
SRR1652467	Aag2 cell line	Piwi4-IP	small RNA sequencing	5,112,109	(Girardi et al. 2017)
SRR1652470	Aag2 cell line	Piwi5-IP	small RNA sequencing	4,619,288	(Girardi et al. 2017)
SRR1652471	Aag2 cell line	Piwi6-IP	small RNA sequencing	4,149,238	(Girardi et al. 2017)
SRR1652472	Aag2 cell line	Ago3-IP	small RNA sequencing	4,764,625	(Girardi et al. 2017)
IP: Immunoprecipitation libraries. ds: Knockdown libraries.
