# Supplementary material
Source: HighWire-hosted journal article supplement (doi:10.1101/rna.073965.119)
Supplement: Supplemental_Table_3.xlsx [file Supplemental_Table_3.xlsx]

## Sheet: Sheet2
chr	origin	feature	start	end	score1	strand	score2	ID	cluster	family
supercont1.286	lab_RNAi	EVE	1321434	1322006	.	+	.	ID=Rhabdoviridae_1529_Contig16_1321434_1322006	1	Rhabdoviridae
supercont1.286	lab_RNAi	EVE	1371308	1372888	.	+	.	ID=Rhabdoviridae_1529_Contig3_1371308_1372888	1	Rhabdoviridae
supercont1.286	lab_RNAi	EVE	1279337	1279847	.	+	.	ID=supercont1.286_2853_1279337_1279847	1	Orthomyxoviridae
supercont1.286	lab_RNAi	EVE	1294902	1296636	.	+	.	ID=supercont1.286_2885_1294902_1296636	1	Unclassified
supercont1.286	lab_RNAi	EVE	1300482	1302189	.	+	.	ID=supercont1.286_2885_1300482_1302189	1	Unclassified
supercont1.286	lab_RNAi	EVE	1304834	1305959	.	+	.	ID=supercont1.286_2885_1304834_1305959	1	Unclassified
supercont1.286	lab_RNAi	EVE	1297766	1297898	.	+	.	ID=supercont1.286_2903_1297766_1297898	1	Unclassified
supercont1.286	lab_RNAi	EVE	1316604	1319731	.	+	.	ID=supercont1.286_2945_1316604_1319731	1	Unclassified
supercont1.286	lab_RNAi	EVE	1340002	1341676	.	+	.	ID=supercont1.286_2990_1340002_1341676	1	Unclassified
supercont1.286	lab_RNAi	EVE	1346412	1347894	.	+	.	ID=supercont1.286_3002_1346412_1347894	1	Unclassified
supercont1.286	lab_RNAi	EVE	1385446	1388574	.	+	.	ID=supercont1.286_3051_1385446_1388574	1	Flaviviridae
supercont1.286	lab_RNAi	EVE	1391834	1393332	.	+	.	ID=supercont1.286_3051_1391834_1393332	1	Flaviviridae
supercont1.286	lab_RNAi	EVE	1429788	1429988	.	+	.	ID=supercont1.286_3058_1429788_1429988	1	Flaviviridae
supercont1.286	lab_RNAi	EVE	1374188	1377046	.	+	.	ID=supercont1.286_3077_1374188_1377046	1	Flaviviridae
supercont1.286	lab_RNAi	EVE	1383185	1383711	.	+	.	ID=supercont1.286_3094_1383185_1383711	1	Unclassified
supercont1.286	lab_RNAi	EVE	1397610	1399548	.	+	.	ID=supercont1.286_3108_1397610_1399548	1	Flaviviridae
supercont1.286	lab_RNAi	EVE	1363195	1368722	.	+	.	ID=supercont1.286_3149_1363195_1368722	1	Flaviviridae
supercont1.286	lab_RNAi	EVE	1406796	1408825	.	+	.	ID=supercont1.286_3149_1406796_1408825	1	Flaviviridae
supercont1.286	lab_RNAi	EVE	1409054	1410362	.	+	.	ID=supercont1.286_3157_1409054_1410362	1	Unclassified
supercont1.286	lab_RNAi	EVE	1441182	1442139	.	+	.	ID=supercont1.286_3216_1441182_1442139	1	Unclassified
supercont1.286	lab_RNAi	EVE	1442403	1443072	.	+	.	ID=supercont1.286_3218_1442403_1443072	1	Unclassified
supercont1.1	lab_RNAi	EVE	1472423	1472903	.	-	.	ID=Rhabdoviridae_1529_Contig14_1472423_1472903	2	Rhabdoviridae
supercont1.1	lab_RNAi	EVE	1199415	1199612	.	+	.	ID=Rhabdoviridae_1529_Contig20_1199415_1199612	2	Rhabdoviridae
supercont1.1	lab_RNAi	EVE	1196167	1196365	.	-	.	ID=supercont1.1_22866_1196167_1196365	2	Peribunyaviridae
supercont1.1	lab_RNAi	EVE	1234754	1235568	.	+	.	ID=supercont1.1_2423_1234754_1235568	2	Orthomyxoviridae
supercont1.1	lab_RNAi	EVE	1242382	1242889	.	+	.	ID=supercont1.1_2423_1242382_1242889	2	Orthomyxoviridae
supercont1.1	lab_RNAi	EVE	1159926	1160999	.	-	.	ID=Rhabdoviridae_1529_Contig5_1159926_1160999	3	Rhabdoviridae
supercont1.1	lab_RNAi	EVE	1249009	1249828	.	-	.	ID=supercont1.1_22753_1249009_1249828	3	Unclassified
supercont1.1	lab_RNAi	EVE	1232469	1233870	.	-	.	ID=supercont1.1_22789_1232469_1233870	3	Unclassified
supercont1.1	lab_RNAi	EVE	1186381	1187626	.	-	.	ID=supercont1.1_22889_1186381_1187626	3	Unclassified
supercont1.1	lab_RNAi	EVE	1309045	1309966	.	+	.	ID=supercont1.1_2584_1309045_1309966	3	Rhabdoviridae
supercont1.1	lab_RNAi	EVE	1335506	1335986	.	+	.	ID=supercont1.1_2635_1335506_1335986	3	Peribunyaviridae
supercont1.209	lab_RNAi	EVE	244127	244522	.	+	.	ID=supercont1.209_520_244127_244522	4	Flaviviridae
supercont1.209	lab_RNAi	EVE	275766	276157	.	+	.	ID=supercont1.209_654_275766_276157	4	Rhabdoviridae
supercont1.209	lab_RNAi	EVE	309201	309594	.	+	.	ID=supercont1.209_654_309201_309594	4	Rhabdoviridae
supercont1.209	lab_RNAi	EVE	335325	338247	.	+	.	ID=supercont1.209_728_335325_338247	4	Orthomyxoviridae
supercont1.209	lab_RNAi	EVE	321110	322220	.	+	.	ID=supercont1.209_746_321110_322220	4	Unclassified
supercont1.209	lab_RNAi	EVE	342895	343228	.	+	.	ID=supercont1.209_746_342895_343228	4	Unclassified
supercont1.209	lab_RNAi	EVE	348258	349392	.	+	.	ID=supercont1.209_760_348258_349392	4	Unclassified
supercont1.1145	lab_RNAi	EVE	61435	62169	.	+	.	ID=supercont1.1145_164_61435_62169	5	Unclassified
supercont1.1145	lab_RNAi	EVE	64144	64885	.	+	.	ID=supercont1.1145_164_64144_64885	5	Unclassified
supercont1.1145	lab_RNAi	EVE	68980	69751	.	+	.	ID=supercont1.1145_164_68980_69751	5	Unclassified
supercont1.1145	lab_RNAi	EVE	67268	68633	.	+	.	ID=supercont1.1145_188_67268_68633	5	Rhabdoviridae
supercont1.1145	lab_RNAi	EVE	78252	80424	.	+	.	ID=supercont1.1145_188_78252_80424	5	Rhabdoviridae
supercont1.1145	lab_RNAi	EVE	83726	84494	.	+	.	ID=supercont1.1145_207_83726_84494	5	Unclassified
supercont1.1145	lab_RNAi	EVE	100960	102805	.	+	.	ID=supercont1.1145_228_100960_102805	5	Flaviviridae
supercont1.1145	lab_RNAi	EVE	94383	98361	.	+	.	ID=supercont1.1145_228_94383_98361	5	Flaviviridae
supercont1.1145	lab_RNAi	EVE	111004	111667	.	+	.	ID=supercont1.1145_268_111004_111667	5	Unclassified
supercont1.1145	lab_RNAi	EVE	112035	114570	.	+	.	ID=supercont1.1145_269_112035_114570	5	Unclassified
supercont1.1145	lab_RNAi	EVE	115557	118354	.	+	.	ID=supercont1.1145_276_115557_118354	5	Rhabdoviridae
supercont1.215	lab_RNAi	EVE	676330	677260	.	+	.	ID=supercont1.215_1507_676330_677260	6	Unclassified
supercont1.215	lab_RNAi	EVE	683628	684427	.	+	.	ID=supercont1.215_1521_683628_684427	6	Peribunyaviridae
supercont1.215	lab_RNAi	EVE	682927	683349	.	+	.	ID=supercont1.215_1580_682927_683349	6	Unclassified
supercont1.215	lab_RNAi	EVE	687560	688122	.	+	.	ID=supercont1.215_1580_687560_688122	6	Unclassified
supercont1.215	lab_RNAi	EVE	692737	692905	.	+	.	ID=supercont1.215_1580_692737_692905	6	Unclassified
supercont1.215	lab_RNAi	EVE	726856	726947	.	+	.	ID=supercont1.215_1581_726856_726947	6	Unclassified
supercont1.20	lab_RNAi	EVE	3085696	3086809	.	-	.	ID=Rhabdoviridae_1529_Contig10_3085696_3086809	7	Rhabdoviridae
supercont1.20	lab_RNAi	EVE	3087411	3088524	.	-	.	ID=Rhabdoviridae_1529_Contig10_3087411_3088524	7	Rhabdoviridae
supercont1.20	lab_RNAi	EVE	3089125	3090238	.	-	.	ID=Rhabdoviridae_1529_Contig10_3089125_3090238	7	Rhabdoviridae
supercont1.20	lab_RNAi	EVE	3090838	3091951	.	-	.	ID=Rhabdoviridae_1529_Contig10_3090838_3091951	7	Rhabdoviridae
supercont1.20	lab_RNAi	EVE	3092547	3093181	.	-	.	ID=Rhabdoviridae_1529_Contig10_3092547_3093181	7	Rhabdoviridae
supercont1.402	lab_RNAi	EVE	860214	861234	.	+	.	ID=supercont1.402_2119_860214_861234	8	Rhabdoviridae
supercont1.402	lab_RNAi	EVE	937515	938187	.	+	.	ID=supercont1.402_2291_937515_938187	8	Unclassified
supercont1.435	lab_RNAi	EVE	942889	944204	.	+	.	ID=Rhabdoviridae_1529_Contig13_942889_944204	9	Rhabdoviridae
supercont1.435	lab_RNAi	EVE	953606	954916	.	+	.	ID=Rhabdoviridae_1529_Contig13_953606_954916	9	Rhabdoviridae
supercont1.435	lab_RNAi	EVE	957455	957773	.	+	.	ID=supercont1.435_2075_957455_957773	9	Flaviviridae
supercont1.435	lab_RNAi	EVE	966832	967723	.	+	.	ID=supercont1.435_2101_966832_967723	9	Rhabdoviridae
supercont1.435	lab_RNAi	EVE	968306	969013	.	+	.	ID=supercont1.435_2102_968306_969013	9	Unclassified
supercont1.697	lab_RNAi	EVE	522056	522524	.	+	.	ID=supercont1.697_1082_522056_522524	10	Unclassified
supercont1.697	lab_RNAi	EVE	526575	527043	.	+	.	ID=supercont1.697_1082_526575_527043	10	Unclassified
supercont1.697	lab_RNAi	EVE	518930	520188	.	+	.	ID=supercont1.697_1088_518930_520188	10	Unclassified
supercont1.697	lab_RNAi	EVE	523851	525282	.	+	.	ID=supercont1.697_1088_523851_525282	10	Unclassified
supercont1.240	lab_RNAi	EVE	1132676	1133816	.	-	.	ID=supercont1.240_4841_1132676_1133816	11	Unclassified
supercont1.240	lab_RNAi	EVE	1126330	1129016	.	-	.	ID=supercont1.240_4856_1126330_1129016	11	Flaviviridae
supercont1.240	lab_RNAi	EVE	1125413	1125937	.	-	.	ID=supercont1.240_4859_1125413_1125937	11	Flaviviridae
supercont1.66	lab_RNAi	EVE	443614	444074	.	-	.	ID=Rhabdoviridae_1529_Contig19_443614_444074	12	Rhabdoviridae
supercont1.66	lab_RNAi	EVE	448977	449457	.	-	.	ID=Rhabdoviridae_1529_Contig19_448977_449457	12	Rhabdoviridae
supercont1.66	lab_RNAi	EVE	454917	455397	.	-	.	ID=Rhabdoviridae_1529_Contig19_454917_455397	12	Rhabdoviridae
supercont1.66	lab_RNAi	EVE	440808	442134	.	-	.	ID=supercont1.66_12458_440808_442134	12	Unclassified
supercont1.589	lab_RNAi	EVE	114900	115371	.	-	.	ID=supercont1.589_3050_114900_115371	13	Unclassified
supercont1.589	lab_RNAi	EVE	75656	84745	.	-	.	ID=supercont1.589_3086_75656_84745	13	Flaviviridae
supercont1.478	lab_RNAi	EVE	536386	537037	.	-	.	ID=supercont1.478_2908_536386_537037	14	Unclassified
supercont1.478	lab_RNAi	EVE	543886	545461	.	-	.	ID=supercont1.478_2889_543886_545461	14	Rhabdoviridae
supercont1.3	lab_RNAi	EVE	3412370	3413171	.	+	.	ID=supercont1.3_7541_3412370_3413171	15	Unclassified
supercont1.3	lab_RNAi	EVE	3419737	3420900	.	+	.	ID=supercont1.3_7549_3419737_3420900	15	Unclassified
supercont1.3	lab_RNAi	EVE	3422264	3423318	.	+	.	ID=supercont1.3_7554_3422264_3423318	15	Unclassified
supercont1.488	lab_RNAi	EVE	344418	345897	.	+	.	ID=Bromoviridae_141_Contig1_344418_345897	16	Bromoviridae
supercont1.488	lab_RNAi	EVE	356041	357520	.	+	.	ID=Bromoviridae_141_Contig1_356041_357520	16	Bromoviridae
supercont1.488	lab_RNAi	EVE	346805	349355	.	-	.	ID=supercont1.488_3122_346805_349355	16	Unclassified
supercont1.59	lab_RNAi	EVE	2375403	2376174	.	+	.	ID=Rhabdoviridae_1529_Contig6_2375403_2376174	17	Rhabdoviridae
supercont1.59	lab_RNAi	EVE	2377960	2378727	.	+	.	ID=Rhabdoviridae_1529_Contig6_2377960_2378727	17	Rhabdoviridae
supercont1.511	lab_RNAi	EVE	408158	410063	.	-	.	ID=supercont1.511_2911_408158_410063	18	Unclassified
supercont1.511	lab_RNAi	EVE	406722	407112	.	-	.	ID=supercont1.511_2916_406722_407112	18	Unclassified
supercont1.468	lab_RNAi	EVE	889675	890086	.	-	.	ID=supercont1.468_2083_889675_890086	19	Unclassified
supercont1.468	lab_RNAi	EVE	888103	889431	.	-	.	ID=supercont1.468_2087_888103_889431	19	Unclassified
supercont1.280	lab_RNAi	EVE	669699	670980	.	+	.	ID=supercont1.280_1400_669699_670980	20	Orthomyxoviridae
supercont1.280	lab_RNAi	EVE	667438	667764	.	+	.	ID=supercont1.280_1403_667438_667764	20	Orthomyxoviridae
supercont1.195	lab_RNAi	EVE	1627011	1627842	.	-	.	ID=supercont1.195_4374_1627011_1627842	21	Unclassified
supercont1.195	lab_RNAi	EVE	1634525	1635356	.	-	.	ID=supercont1.195_4374_1634525_1635356	21	Unclassified
supercont1.158	lab_RNAi	EVE	1192493	1192721	.	+	.	ID=supercont1.158_2594_1192493_1192721	22	Orthomyxoviridae
supercont1.158	lab_RNAi	EVE	1192252	1192519	.	-	.	ID=supercont1.158_6309_1192252_1192519	22	Orthomyxoviridae
supercont1.1077	lab_RNAi	EVE	70107	70803	.	+	.	ID=supercont1.1077_160_70107_70803	23	Rhabdoviridae
supercont1.1077	lab_RNAi	EVE	69489	69789	.	-	.	ID=supercont1.1077_900_69489_69789	23	Rhabdoviridae
supercont1.1	lab_RNAi	EVE	1248147	1248973	.	+	.	ID=Rhabdoviridae_1529_Contig8_1248147_1248973	24	Rhabdoviridae
supercont1.1	lab_RNAi	EVE	1250800	1251169	.	+	.	ID=supercont1.1_2462_1250800_1251169	25	Orthomyxoviridae
supercont1.1	lab_RNAi	EVE	1263632	1264340	.	-	.	ID=supercont1.1_22726_1263632_1264340	26	Rhabdoviridae
supercont1.1	lab_RNAi	EVE	1197140	1197677	.	-	.	ID=supercont1.1_22863_1197140_1197677	27	Reoviridae
supercont1.1	lab_RNAi	EVE	1200972	1201806	.	-	.	ID=supercont1.1_22851_1200972_1201806	28	Flaviviridae
supercont1.1	lab_RNAi	EVE	1200051	1200757	.	-	.	ID=supercont1.1_22855_1200051_1200757	29	Rhabdoviridae
supercont1.1118	lab_RNAi	EVE	35221	35368	.	-	.	ID=supercont1.1118_912_35221_35368	30	Rhabdoviridae
supercont1.1288	lab_RNAi	EVE	9846	12234	.	-	.	ID=supercont1.1288_555_9846_12234	31	Unclassified
supercont1.152	lab_RNAi	EVE	1982721	1984101	.	-	.	ID=supercont1.152_4827_1982721_1984101	32	Unclassified
supercont1.153	lab_RNAi	EVE	562301	562460	.	-	.	ID=supercont1.153_7865_562301_562460	33	Rhabdoviridae
supercont1.172	lab_RNAi	EVE	480519	482499	.	-	.	ID=supercont1.172_7518_480519_482499	34	Unclassified
supercont1.173	lab_RNAi	EVE	1111303	1111906	.	+	.	ID=supercont1.173_2365_1111303_1111906	35	Unclassified
supercont1.184	lab_RNAi	EVE	258516	260211	.	-	.	ID=supercont1.184_7980_258516_260211	36	Unclassified
supercont1.192	lab_RNAi	EVE	558853	559261	.	-	.	ID=Rhabdoviridae_1529_Contig14_558853_559261	37	Rhabdoviridae
supercont1.194	lab_RNAi	EVE	877491	877947	.	-	.	ID=supercont1.194_6350_877491_877947	38	Rhabdoviridae
supercont1.2	lab_RNAi	EVE	309221	309360	.	+	.	ID=Rhabdoviridae_1529_Contig23_309221_309360	39	Rhabdoviridae
supercont1.2	lab_RNAi	EVE	785844	786654	.	-	.	ID=Rhabdoviridae_1529_Contig10_785844_786654	40	Rhabdoviridae
supercont1.20	lab_RNAi	EVE	3178952	3180701	.	-	.	ID=supercont1.20_10999_3178952_3180701	41	Rhabdoviridae
supercont1.209	lab_RNAi	EVE	324535	327057	.	+	.	ID=supercont1.209_697_324535_327057	42	Orthomyxoviridae
supercont1.209	lab_RNAi	EVE	203205	203350	.	+	.	ID=supercont1.209_462_203205_203350	43	Flaviviridae
supercont1.209	lab_RNAi	EVE	265011	265073	.	-	.	ID=supercont1.209_7350_265011_265073	44	Flaviviridae
supercont1.209	lab_RNAi	EVE	331636	333010	.	+	.	ID=supercont1.209_746_331636_333010	45	Unclassified
supercont1.209	lab_RNAi	EVE	211737	213084	.	+	.	ID=supercont1.209_462_211737_213084	46	Flaviviridae
supercont1.209	lab_RNAi	EVE	350811	351219	.	+	.	ID=supercont1.209_763_350811_351219	47	Unclassified
supercont1.215	lab_RNAi	EVE	691808	692473	.	+	.	ID=supercont1.215_1580_691808_692473	48	Unclassified
supercont1.215	lab_RNAi	EVE	710761	712147	.	+	.	ID=supercont1.215_1580_710761_712147	49	Unclassified
supercont1.219	lab_RNAi	EVE	1484116	1488865	.	-	.	ID=supercont1.219_4264_1484116_1488865	50	Unclassified
supercont1.240	lab_RNAi	EVE	1286371	1287085	.	+	.	ID=supercont1.240_2421_1286371_1287085	51	Unclassified
supercont1.260	lab_RNAi	EVE	381444	382785	.	+	.	ID=supercont1.260_844_381444_382785	52	Unclassified
supercont1.261	lab_RNAi	EVE	539727	540145	.	+	.	ID=Rhabdoviridae_1529_Contig21_539727_540145	53	Rhabdoviridae
supercont1.261	lab_RNAi	EVE	512657	512804	.	-	.	ID=supercont1.261_5867_512657_512804	54	Unclassified
supercont1.28	lab_RNAi	EVE	209096	209514	.	-	.	ID=Rhabdoviridae_1529_Contig21_209096_209514	55	Rhabdoviridae
supercont1.305	lab_RNAi	EVE	537095	537325	.	-	.	ID=Rhabdoviridae_1529_Contig20_537095_537325	56	Rhabdoviridae
supercont1.305	lab_RNAi	EVE	831996	832458	.	+	.	ID=supercont1.305_1894_831996_832458	57	Unclassified
supercont1.31	lab_RNAi	EVE	1575719	1576040	.	-	.	ID=supercont1.31_12640_1575719_1576040	58	Peribunyaviridae
supercont1.315	lab_RNAi	EVE	1173106	1174120	.	+	.	ID=supercont1.315_2649_1173106_1174120	59	Unclassified
supercont1.326	lab_RNAi	EVE	248596	249133	.	+	.	ID=supercont1.326_395_248596_249133	60	Orthomyxoviridae
supercont1.328	lab_RNAi	EVE	801757	803236	.	-	.	ID=Bromoviridae_141_Contig1_801757_803236	61	Bromoviridae
supercont1.376	lab_RNAi	EVE	1031875	1032343	.	+	.	ID=supercont1.376_2284_1031875_1032343	62	Unclassified
supercont1.379	lab_RNAi	EVE	85394	86504	.	-	.	ID=supercont1.379_4361_85394_86504	63	Orthomyxoviridae
supercont1.381	lab_RNAi	EVE	262150	262480	.	+	.	ID=supercont1.381_590_262150_262480	64	Unclassified
supercont1.39	lab_RNAi	EVE	1348823	1349426	.	+	.	ID=supercont1.39_2682_1348823_1349426	65	Unclassified
supercont1.39	lab_RNAi	EVE	1015762	1016365	.	+	.	ID=supercont1.39_2682_1015762_1016365	66	Unclassified
supercont1.39	lab_RNAi	EVE	1023520	1024123	.	-	.	ID=supercont1.39_2682_1023520_1024123	67	Unclassified
supercont1.398	lab_RNAi	EVE	620466	621081	.	-	.	ID=supercont1.398_3277_620466_621081	68	Unclassified
supercont1.4	lab_RNAi	EVE	142909	143548	.	+	.	ID=supercont1.4_291_142909_143548	69	Rhabdoviridae
supercont1.402	lab_RNAi	EVE	898982	899606	.	+	.	ID=supercont1.402_2208_898982_899606	70	Iflaviridae
supercont1.402	lab_RNAi	EVE	879205	879559	.	+	.	ID=supercont1.402_2165_879205_879559	71	Unclassified
supercont1.402	lab_RNAi	EVE	891834	892134	.	+	.	ID=supercont1.402_2191_891834_892134	72	Unclassified
supercont1.403	lab_RNAi	EVE	914951	915100	.	+	.	ID=Rhabdoviridae_1529_Contig23_914951_915100	73	Rhabdoviridae
supercont1.404	lab_RNAi	EVE	1142749	1145239	.	+	.	ID=supercont1.404_2277_1142749_1145239	74	Unclassified
supercont1.412	lab_RNAi	EVE	689628	690096	.	+	.	ID=supercont1.412_1331_689628_690096	75	Unclassified
supercont1.42	lab_RNAi	EVE	249185	249718	.	-	.	ID=supercont1.42_13938_249185_249718	76	Unclassified
supercont1.425	lab_RNAi	EVE	40903	41593	.	-	.	ID=supercont1.425_4290_40903_41593	77	Unclassified
supercont1.439	lab_RNAi	EVE	8396	9431	.	+	.	ID=supercont1.439_28_8396_9431	78	Unclassified
supercont1.456	lab_RNAi	EVE	777454	778741	.	-	.	ID=supercont1.456_2434_777454_778741	79	Unclassified
supercont1.47	lab_RNAi	EVE	811009	811123	.	-	.	ID=supercont1.15_12366_811009_811123	80	Orthomyxoviridae
supercont1.478	lab_RNAi	EVE	561428	562208	.	-	.	ID=supercont1.478_2840_561428_562208	81	Rhabdoviridae
supercont1.50	lab_RNAi	EVE	429549	432665	.	-	.	ID=supercont1.50_13161_429549_432665	82	Unclassified
supercont1.508	lab_RNAi	EVE	5683	6004	.	+	.	ID=supercont1.508_12_5683_6004	83	Peribunyaviridae
supercont1.52	lab_RNAi	EVE	163022	163148	.	-	.	ID=supercont1.52_13437_163022_163148	84	Flaviviridae
supercont1.55	lab_RNAi	EVE	683582	684608	.	-	.	ID=supercont1.55_12434_683582_684608	85	Unclassified
supercont1.555	lab_RNAi	EVE	235526	236840	.	-	.	ID=supercont1.555_3018_235526_236840	86	Unclassified
supercont1.589	lab_RNAi	EVE	72468	73416	.	-	.	ID=supercont1.589_3102_72468_73416	87	Flaviviridae
supercont1.589	lab_RNAi	EVE	85368	87890	.	-	.	ID=supercont1.589_3086_85368_87890	88	Flaviviridae
supercont1.63	lab_RNAi	EVE	1839290	1839520	.	-	.	ID=Rhabdoviridae_1529_Contig19_1839290_1839520	89	Rhabdoviridae
supercont1.76	lab_RNAi	EVE	1838653	1840230	.	+	.	ID=Rhabdoviridae_1529_Contig2_1838653_1840230	90	Rhabdoviridae
supercont1.765	lab_RNAi	EVE	461779	463106	.	-	.	ID=Rhabdoviridae_1529_Contig3_461779_463106	91	Rhabdoviridae
supercont1.765	lab_RNAi	EVE	471196	471528	.	-	.	ID=Rhabdoviridae_1529_Contig16_471196_471528	92	Rhabdoviridae
supercont1.765	lab_RNAi	EVE	4846	5042	.	-	.	ID=supercont1.765_2223_4846_5042	93	Rhabdoviridae
supercont1.790	lab_RNAi	EVE	358187	358512	.	+	.	ID=supercont1.488_805_358187_358512	94	Unclassified
supercont1.826	lab_RNAi	EVE	356359	356539	.	-	.	ID=supercont1.826_1220_356359_356539	95	environmentalsamples
supercont1.85	lab_RNAi	EVE	1557268	1557811	.	+	.	ID=supercont1.85_3396_1557268_1557811	96	Unclassified
supercont1.88	lab_RNAi	EVE	2587342	2587889	.	-	.	ID=Rhabdoviridae_1529_Contig10_2587342_2587889	97	Rhabdoviridae
supercont1.90	lab_RNAi	EVE	930834	931008	.	-	.	ID=supercont1.90_9915_930834_931008	98	Unclassified
supercont1.90	lab_RNAi	EVE	917884	918142	.	-	.	ID=supercont1.90_9944_917884_918142	99	Rhabdoviridae
supercont1.910	lab_RNAi	EVE	178306	179164	.	-	.	ID=supercont1.910_1162_178306_179164	100	Rhabdoviridae
supercont1.959	lab_RNAi	EVE	282262	282554	.	+	.	ID=supercont1.959_567_282262_282554	101	Unclassified
