# Supplementary material
Source: HighWire-hosted journal article supplement (doi:10.1101/rna.073965.119)
Supplement: Supplemental_Table_4.xlsx [file Supplemental_Table_4.xlsx]

## Sheet: A. aegypti piRNA clusters
chromosome	start	end	size	coverage +	coverage -	ratio	OBS
2	461212001	461320001	108000	0	63408	0	Top5 uni-strand cluster (EVE cluster 38)
3	314198001	314216001	18000	43651	1	43651	Top5 uni-strand cluster
2	469198001	469262001	64000	34779	3	11593	Top5 uni-strand cluster
3	314164001	314196001	32000	30302	1	30302	Top5 uni-strand cluster
1	210438001	210462001	24000	0	29010	0	Top5 uni-strand cluster
3	106040001	106056001	16000	0	25034	0
2	461326001	461374001	48000	1	23812	4.19956e-05
3	106068001	106090001	22000	1	23723	4.21532e-05
1	91792001	91836001	44000	22482	1	22482
3	158080001	158084001	4000	14565	1	14565
3	313432001	313440001	8000	0	13989	0
3	275438001	275440001	2000	0	12664	0
2	469264001	469284001	20000	10100	1	10100
3	314096001	314110001	14000	8103	1	8103
3	313442001	313462001	20000	0	7603	0
3	282818001	282824001	6000	7172	1	7172
3	275402001	275408001	6000	0	6785	0
1	210500001	210538001	38000	0	6399	0
3	105986001	105992001	6000	0	6151	0
1	210480001	210498001	18000	0	5837	0
3	191420001	191442001	22000	5207	5	1041.4
3	275422001	275436001	14000	2	4796	0.000417014
3	106028001	106038001	10000	0	4793	0
3	275410001	275418001	8000	0	4278	0
2	33864001	33874001	10000	1	3822	0.000261643
3	148356001	148378001	22000	3663	1	3663
3	191300001	191306001	6000	3624	1	3624
3	105972001	105974001	2000	0	3502	0
3	41154001	41160001	6000	0	3278	0
3	313464001	313482001	18000	0	3253	0
2	101594001	101596001	2000	1340	1893	0.707871	Top5 dual-strand cluster
3	313484001	313498001	14000	0	3202	0
3	105714001	105718001	4000	3190	1	3190
1	210546001	210580001	34000	0	2652	0
2	204908001	204914001	6000	0	2378	0
2	469166001	469176001	10000	2267	1	2267
3	351124001	351126001	2000	2256	1	2256
1	261318001	261320001	2000	0	2241	0
3	105844001	105846001	2000	2159	1	2159
1	140794001	140796001	2000	0	2130	0
1	140962001	140978001	16000	1868	1	1868
3	105792001	105806001	14000	1799	1	1799
3	341056001	341058001	2000	1687	1	1687
3	105760001	105768001	8000	1531	1	1531
3	214510001	214516001	6000	0	1512	0
3	314132001	314162001	30000	1410	1	1410
1	218692001	218698001	6000	1403	1	1403
3	105962001	105966001	4000	1	1380	0.000724638
1	206846001	206848001	2000	1373	1	1373
3	191370001	191382001	12000	1372	1	1372
2	101526001	101528001	2000	8	1244	0.00643087
1	73130001	73138001	8000	1245	1	1245
1	210466001	210478001	12000	0	1177	0
1	218708001	218722001	14000	1138	6	189.667
1	218672001	218676001	4000	1124	1	1124
3	233086001	233088001	2000	0	1073	0
2	147502001	147510001	8000	970	1	970
2	147556001	147570001	14000	954	1	954
3	106010001	106026001	16000	0	925	0
2	147536001	147540001	4000	895	4	223.75
1	303694001	303696001	2000	880	1	880
1	247874001	247876001	2000	0	875	0
2	20926001	20928001	2000	0	854	0
3	38286001	38296001	10000	0	834	0
1	256058001	256060001	2000	5	826	0.00605327
2	169990001	169992001	2000	815	1	815
2	191884001	191890001	6000	0	792	0
2	204904001	204906001	2000	0	788	0
1	218682001	218686001	4000	786	1	786
2	251062001	251064001	2000	0	770	0
3	108110001	108116001	6000	727	2	363.5
3	106064001	106066001	2000	0	695	0
1	213006001	213020001	14000	679	1	679
2	147526001	147530001	4000	672	1	672
2	261658001	261660001	2000	0	670	0
2	145200001	145202001	2000	0	643	0
1	210540001	210544001	4000	0	638	0
3	275450001	275456001	6000	1	632	0.00158228
2	446908001	446910001	2000	618	1	618
2	204922001	204930001	8000	0	612	0
2	470306001	470308001	2000	394	214	1.84112	Top5 dual-strand cluster
2	469148001	469156001	8000	608	1	608
2	185986001	185988001	2000	599	1	599
1	108736001	108738001	2000	0	599	0
3	45632001	45634001	2000	531	5	106.2
2	469190001	469196001	6000	525	1	525
1	213000001	213004001	4000	511	1	511
1	3560001	3562001	2000	0	497	0
2	212294001	212296001	2000	0	497	0
1	15830001	15832001	2000	0	486	0
3	313500001	313504001	4000	0	464	0
3	383276001	383278001	2000	0	440	0
1	52838001	52844001	6000	52	385	0.135065	Top5 dual-strand cluster
2	469138001	469146001	8000	428	1	428
3	105888001	105900001	12000	418	1	418
3	214488001	214492001	4000	0	409	0
2	238122001	238124001	2000	398	1	398
3	233184001	233186001	2000	0	391	0
3	363954001	363956001	2000	0	376	0
2	472390001	472392001	2000	0	374	0
3	244996001	244998001	2000	0	374	0
2	212316001	212322001	6000	0	362	0
3	383288001	383290001	2000	0	353	0
1	220702001	220704001	2000	350	1	350
2	469158001	469164001	6000	347	1	347
2	45576001	45578001	2000	0	333	0
1	140992001	141004001	12000	322	1	322
2	147520001	147524001	4000	320	1	320
3	275442001	275444001	2000	1	314	0.00318471
3	191390001	191394001	4000	296	1	296
1	140952001	140954001	2000	289	1	289
3	214496001	214504001	8000	0	286	0
2	375256001	375258001	2000	265	1	265
3	191498001	191502001	4000	0	263	0
3	383284001	383286001	2000	0	259	0
3	288850001	288852001	2000	243	1	243
1	91786001	91788001	2000	242	1	242
2	204952001	204958001	6000	2	240	0.00833333
2	157718001	157720001	2000	0	236	0
3	246066001	246074001	8000	0	236	0
3	213024001	213026001	2000	0	232	0
2	217816001	217820001	4000	1	216	0.00462963
3	191410001	191418001	8000	213	1	213
1	141044001	141048001	4000	181	1	181
1	31750001	31752001	2000	173	1	173
2	34180001	34184001	4000	168	1	168
3	363960001	363962001	2000	0	166	0
1	153430001	153432001	2000	164	1	164
1	160276001	160280001	4000	162	1	162
1	141008001	141036001	28000	158	1	158
2	319626001	319628001	2000	143	1	143
3	105904001	105912001	8000	138	1	138
3	191386001	191388001	2000	130	1	130
2	149766001	149768001	2000	0	128	0
3	212400001	212402001	2000	6	121	0.0495868
2	204960001	204962001	2000	15	108	0.138889	Top5 dual-strand cluster
2	212308001	212312001	4000	0	118	0
1	144944001	144956001	12000	114	1	114
2	246680001	246682001	2000	2	110	0.0181818
2	212302001	212306001	4000	0	112	0
1	212994001	212996001	2000	111	1	111
3	394300001	394304001	4000	100	1	100
3	105882001	105886001	4000	93	1	93
1	91842001	91844001	2000	87	1	87
2	212290001	212292001	2000	0	81	0
1	299164001	299166001	2000	0	80	0
2	317452001	317454001	2000	0	77	0
2	147512001	147518001	6000	77	1	77
3	191482001	191484001	2000	0	76	0
3	191404001	191408001	4000	73	1	73
2	435156001	435160001	4000	66	1	66
2	463296001	463298001	2000	0	64	0
3	275460001	275462001	2000	0	62	0
1	298262001	298266001	4000	0	59	0
1	218654001	218668001	14000	59	1	59
3	191346001	191348001	2000	59	1	59
1	308068001	308070001	2000	0	56	0
1	58012001	58028001	16000	55	1	55
3	191310001	191342001	32000	55	1	55
3	150936001	150954001	18000	0	54	0
3	268646001	268648001	2000	54	1	54
1	216376001	216378001	2000	0	51	0
2	469178001	469180001	2000	46	1	46
3	105994001	106004001	10000	0	43	0
1	296714001	296718001	4000	40	1	40
3	150962001	150970001	8000	0	40	0
1	168756001	168758001	2000	2	38	0.0526316
3	105832001	105834001	2000	37	1	37
3	148380001	148382001	2000	36	1	36
1	23218001	23222001	4000	33	1	33
1	91838001	91840001	2000	29	1	29
1	152068001	152070001	2000	28	1	28
3	148324001	148346001	22000	27	1	27
3	191490001	191494001	4000	1	24	0.0416667
2	246392001	246400001	8000	14	11	1.27273	Top5 dual-strand cluster
2	469288001	469294001	6000	24	1	24
3	105864001	105880001	16000	24	1	24
1	175480001	175482001	2000	23	1	23
1	150952001	150956001	4000	23	1	23
2	216788001	216792001	4000	14	8	1.75
1	195310001	195312001	2000	0	22	0
2	220892001	220894001	2000	21	1	21
3	167080001	167082001	2000	0	21	0
1	196040001	196044001	4000	0	20	0
1	109652001	109656001	4000	0	20	0
3	106058001	106062001	4000	0	19	0
1	298258001	298262001	4000	0	19	0
2	152098001	152100001	2000	18	1	18
1	132344001	132348001	4000	18	1	18
3	191468001	191470001	2000	0	18	0
3	105818001	105824001	6000	17	1	17
1	160272001	160274001	2000	17	1	17
3	191504001	191506001	2000	0	16	0
2	469296001	469304001	8000	16	1	16
3	10696001	10698001	2000	14	1	14
3	298922001	298936001	14000	15	1	15
3	18638001	18642001	4000	0	15	0
3	383280001	383282001	2000	0	15	0
1	38184001	38196001	12000	0	14	0
3	105956001	105960001	4000	0	14	0
1	8748001	8750001	2000	14	1	14
