# Supplementary material
Source: HighWire-hosted journal article supplement (doi:10.1101/rna.073965.119)
Supplement: Supplemental_Table_5.xlsx [file Supplemental_Table_5.xlsx]

## Sheet: up to 2 mm
Reference	Number of piRNAs
NC_030400.1_Nakiwogo_virus_strain_Uganda08_polyprotein_gene	8
NC_014637.1_Cafeteria_roenbergensis_virus_BV-PW1	1
NC_035187.1_Mac_Peak_virus_isolate_McPV_150840_polyprotein_gene	2
NC_021069.1_Mosquito_flavivirus_isolate_LSFlaviV-A20-09	2
NC_026620.1_Jutiapa_virus_strain_JG-128	4
NC_012533.1_Kedougou_virus_strain_DakAar_D1470	30
NC_012932.1_Aedes_flavivirus_genomic_RNA	23
NC_015281.1_Synechococcus_phage_S-ShM2	1
NC_035674.1_Australian_Anopheles_totivirus_isolate_AATV_150840	71
NC_007581.1_Clostridium_phage_c-st	1
NC_028238.1_Turkeypox_virus_strain_TKPV-HU1124/2011	4
NC_039219.1_Royal_Farm_virus_from_Afghanistan_polyprotein_gene	38
NC_027867.1_Mollivirus_sibericum_isolate_P1084-T	2
NC_012534.1_Bagaza_virus_strain_DakAr_B209	4
NC_029121.1_Bacillus_phage_Bp8p-C	1
NC_035117.1_Common_bottlenose_dolphin_gammaherpesvirus_1_strain_Sarasota	3
NC_034017.1_Xishuangbanna_aedes_flavivirus	54
NC_033694.1_Palm_Creek_virus_isolate_56_polyprotein_gene	46
NC_034007.1_Phnom_Penh_bat_virus_strain_30834_A38	20
NC_038281.1_Drosophila_melanogaster_sigma_virus_HAP23	3
NC_008604.2_Culex_flavivirus	2
NC_034204.1_Menghai_flavivirus_isolate_MHAedFV1	1
NC_023865.1_Pectobacterium_phage_PM1	3
NC_040645.1_Culex_Flavi-like_virus_strain_CFVL/San_Francisco	168
NC_005064.1_Kamiti_River_virus	101
